# Supplementary material for: Transcriptomic and Phenotypic Analysis of a spoIIE Mutant in Clostridium beijerinckii
Source: Front Microbiol. 2020 Sep 15;11:556064. doi: 10.3389/fmicb.2020.556064 (PMC7522474; doi:10.3389/fmicb.2020.556064)
Supplement: TABLE S1 — Oligonucleotides used in this study; the restriction sites are underlined. [file Data_Sheet_1.xlsx]

## Sheet: Supplementary Table 1
Primer	Purpose	Sequence (5'-3')
M392	Removing CatP et cloning aad9 into pRAN473	ACACTGTCAGACACTTATCACTAAGTTCCCTCTCAAATTCAAGTTTATCGC
M393	Removing CatP et cloning aad9 into pRAN473	CGTTCCACTGAGCGTCAGACCTACTACTGACAGCTTCCAAGGAGC
M394	Cloning aad9 into pRAN473	TGATAAGTGTCTGACAGTGTCACAG
M395	Cloning aad9 into pRAN473	GTCTGACGCTCAGTGGAACGAAAACTC
M396	Cloning Cbei_0097 into pRAN473S	AAATGAACGCATGCGTCGACAACAACAACATGAGGCGAGCTAATGTGCAG
M397	Cloning Cbei_0097 into pRAN473S	TTATTAAAACTTATAGGATCCTTAGCTATCTAAATAAACTTTTGAAACTACTACTGTC

## Sheet: Supplementary Table 2
Target gene	Left Primer (5'-3')	Right Primer (5'-3')	PCR efficiency	Fold change at 23 h
				RNAseq value	Q-RT-PCR
gyra (Cbei_0007 )	aggaatcgcagttggtatgg	cccatcaattatttcagccaaa	2.1808	1.46	0.83
spo0A (Cbei_1712)	tgaaagagcaataagacatgcaa	ccaaataacctgttaatagcctcaa	1.9945	0.822	0.907753
sigF (Cbei_0814)	cacctactatagaagagcttgca	ggagctccgtcatcctgat	2.0976	0.68	0.933258
sigG (Cbei_1121)	tcactgtttgagccaatttatca	tttcaagccaatgttcatctgt	2.1298	0.321	0.81846
spoIIQ (Cbei_0094)	ttccatctgcctgcttatcc	gcgctatctcctacttttgca	1.8524	0.003	0.0197213
spoIIR (Cbei_0395)	tgtagacgaatcaaaggcaca	ttccatctgcctgcttatcc	1.931	0.534	0.133792
yabG (Cbei_0388)	gaaggccaggaaagattctcc	atagctctccccactgcatc	1.9945	0.006	0.146107
smpa (Cbei_0051)	aaggcgatggaagaaatgga	accgagttacatgctgctct	2.1085	0.03	0.00118287
sipL (Cbei_0391)	gggactcgcagtaaattcgg	tcaatattacactctgcctcgc	2.0178	0.019	0.165021
buk1 (Cbei_0204)	ttgaatggatagccccagtt	gcaccttgagctagagcaagtaa	2.0557	4.955	3.87409
gpr (Cbei_0822)	agtgacaccagatgctttagg	cctgtaactccaagcactcc	2.0803	0.083	0.411553
dnaJ (Cbei_0831)	tgcttttgatggtagtggcg	atttgatcctccgcctccaa	1.987	4.85	4

## Sheet: Supplementary Table 3
ΔspoIIE isolate	Gene ID	Predicted function	Change	CDS Position	Codon Change	Amino Acid Change	Polymorphism Type	Protein Effect
E, G, M			A -> G				SNP (transition)
E, G, M			GAGGCGAG -> AGTAGTTT				Substitution
E, G, M			T -> A				SNP (transversion)
G, M			T -> A				SNP (transversion)
E, G	Cbei_0198	peptidase	C -> A	1083	GAC -> GAA	D -> E	SNP (transversion)	Substitution
G	Cbei_0388	peptidase	C -> T	307	CCA -> TCA	P -> S	SNP (transition)	Substitution
E, G			W -> A	160	WTA -> ATA	X -> I	SNP	Substitution
C5, E, G, M	Cbei_0826	hypothetical protein	C -> A	170	TCC -> TAC	S -> Y	SNP (transversion)	Substitution
E, G, M			G -> A				SNP (transition)
G			TT -> GC				Substitution
G			TTC -> GCA				Substitution
E, M			TC -> CA				Substitution
E, G	Cbei_0933	ABC transporter substrate-binding protein	TGTACCGA -> CTGCAGGT	2	ATG,TAC,CGA -> ACT,GCA,GGT	MYR -> TAG	Substitution	Substitution
C5	Cbei_1353	hypothetical protein	C -> T	2858	GCA -> GTA	A -> V	SNP (transition)	Substitution
C5, E, G			G -> A				SNP (transition)
E, G	Cbei_1939	ABC transporter permease	T -> C	362	GTC -> GCC	V -> A	SNP (transition)	Substitution
C5, E, G	Cbei_2581	hypothetical protein	G -> T	113	CCT -> CAT	P -> H	SNP (transversion)	Substitution
C5, G, M	Cbei_3078	PAS domain-containing two-component system sensor histidine kinase/response regulator	C -> A	1066			SNP (transversion)	Truncation
E, G	Cbei_3390	baseplate J protein	C -> A	1087			SNP (transversion)	Truncation
C5, E, G, M			G -> A				SNP (transition)
C5, E, G, M			C -> A				SNP (transversion)
E, G, M	Cbei_4594	2-hydroxyacid dehydrogenase	C -> A	244	GAC -> TAC	D -> Y	SNP (transversion)	Substitution
G	Cbei_4853	DNA polymerase III subunit alpha	C -> A	1072	GAC -> TAC	D -> Y	SNP (transversion)	Substitution
E, G			W -> A				SNP

## Sheet: Supplementary Table 4
Gene ID	Predicted protein function	Putative encoded protein	log2 fold change in expression ΔspoIIE_C5 relative to the WT
			4 h	11 h	23 h
Stress response
Cbei_0328	chaperonin Cpn10	GroEL	2.22	-1.794	2.035
Cbei_0569	Rubrerythrin		-7.025	-5.571	-7.549
Cbei_2325	Rubrerythrin		-5.343	-4.618	-7.704
Cbei_4834	Catalase		-5.501	-3.003	-8.205
Sporulation
Cbei_0088	transcriptional regulator, AbrB family	SpoVT	-4.525	-4.955	-9.107
Cbei_0093	YabP family protein	YabP	-2.898	-3.394	-6.139
Cbei_0199	cell wall hydrolase, SleB	SleB	-4.857	-5.488	-8.125
Cbei_0385	Spore coat protein CotS	CotS	-4.757	-3.291	-10.106
Cbei_0388	peptidase U57, YabG	YabG	-5.38	-4.172	-7.372
Cbei_0422	Sporulation stage II, protein D firmicutes	SpoIID	-4.334	-4.708	-6.025
Cbei_0474	small acid-soluble spore protein, alpha/beta type	Sasp	-4.127	-2.484	-9.12
Cbei_0567	Sporulation protein YhbH	YhbH	-6.669	-5.56	-6.244
Cbei_0850	Spore coat protein CotS	CotS	-5.379	-5.847	-6.467
Cbei_1033	GerA spore germination protein	GerA	-3.963	-2.711	-7.937
Cbei_1115	RNA polymerase, sigma 28 subunit, FliA/WhiG family	σK	-4.745	-5.548	-9.086
Cbei_1211	aspartate kinase	DapG	-1.912	-2.953	-3.547
Cbei_1274	Sporulation protein YtaF	Ytaf	-7.112	-2.635	-9.094
Cbei_1454	peptidase S8 and S53, subtilisin, kexin, sedolisin		-2.582	-3.244	-4.443
Cbei_1568	Sporulation protein YtxC	Ytxc	-5.425	-4.448	-11.715
Cbei_1711	Peptidase S55, sporulation stage IV, protein B	SpoIVB	-4.839	-2.664	-8.816
Cbei_1789	polysaccharide deacetylase		-6.485	-4.661	-5.232
Cbei_1798	small acid-soluble spore protein	Sasp	-4.982	-3.731	-6.165
Cbei_1877	Sporulation protein YtfJ	YtfJ	-4.834	-7.47	-8.328
Cbei_2069	manganese containing catalase		-8.036	-4.035	-9.66
Cbei_2070	spore coat peptide assembly protein CotJB	CotjB	-9.164	-3.558	-9.646
Cbei_2345	small acid-soluble spore protein, alpha/beta type	Sasp	-8.598	-3.62	-9.971
Cbei_2471	small acid-soluble spore protein, alpha/beta type	Sasp	-6.751	-3.817	-11.503
Cbei_2588	Collagen triple helix repeat		-4.099	-4.362	-9.064
Cbei_3111	small acid-soluble spore protein, alpha/beta type	Sasp	-7.494	-2.229	-13.271
Cbei_3245	Peptidoglycan-binding domain 1 protein		-4.621	-4.542	-6.661
Cbei_3275	small acid-soluble spore protein, alpha/beta type	Sasp	-5.705	-2.863	-10.919
Cbei_4612	Coat F domain protein		-7.299	-4.131	-10.309
Cbei_4614	Coat F domain protein		-5.197	-3.794	-8.689
Cbei_4922	conserved hypothetical protein		-6.514	-4.202	-9.387
Acidogenesis/ solventogenesis
Cbei_0305	iron-containing alcohol dehydrogenase	Adh	-1.621	-2.09	-4.364
Cbei_2653	3-oxoacid CoA-transferase, B subunit	CtfA	-5.497	-5.015	-6.585
Cbei_2654	3-oxoacid CoA-transferase, A subunit	CtfB	-5.676	-4.488	-6.458
Cbei_4041	pyruvate ferredoxin/flavodoxin oxidoreductase, beta subunit		-4.862	-3.988	-6.03
Amino acid transport and metabolism
Cbei_0111	amidohydrolase-like protein		-5.168	-6.045	-6.59
Cbei_0585	Cysteine desulfurase		-4.759	-1.814	-8.785
Cbei_1034	asparagine synthase (glutamine-hydrolyzing)		-5.532	-1.875	-8.561
Cbei_1883	amino acid permease-associated region		-4.089	-4.458	-4.396
Cbei_2072	extracellular solute-binding protein, family 3		-6.862	-3.843	-9.218
Cbei_2597	DegT/DnrJ/EryC1/StrS aminotransferase		-6.157	-4.308	-9.505
Cbei_2598	amine oxidase		-5.874	-2.736	-8.74
Cbei_2599	cysteine desulfurase family protein		-5.915	-2.872	-7.967
Cbei_3977	oligopeptide/dipeptide ABC transporter, ATPase subunit		-2.632	-4.524	-5.874
Cbei_4105	amine oxidase		-3.846	-4.035	-6.073
Cbei_4527	amino acid permease-associated region		-3.042	-3.572	-6.154
Cbei_4711	Glutamine--scyllo-inositol transaminase		-4.177	-4.6	-5.284
Carbohydrate metabolism
Cbei_0549	L-ribulose-5-phosphate 4-epimerase		-2.393	-2.644	-3.129
Cbei_0550	Phosphomannomutase		-1.757	-1.648	-2.733
Cbei_0772	glycoside hydrolase, family 31		-1.721	-1.613	-3.195
Cbei_1729	glycosyltransferase, MGT family		-4.112	-3.116	-5.261
Cbei_1833	Mannitol dehydrogenase, C-terminal domain		-2.912	-2.992	2.36
Cbei_1836	response regulator receiver protein		-2.286	-2.668	-1.912
Cbei_2468	glycogen debranching enzyme GlgX		-3.004	-2.294	-4.952
Cbei_2954	Cupin 2, conserved barrel domain protein		-6.434	-2.111	-8.467
Cbei_3039	Fructose-bisphosphate aldolase		-4.715	-4.621	-4.615
Cbei_4773	glycosyltransferase 36		-1.661	-2.437	-5.22
Cell wall/membrane/envelope biogenesis
Cbei_0089	polysaccharide biosynthesis protein		-2.877	-4.467	-6.097
Cbei_0382	glycosyl transferase, group 1		-6.265	-3.442	-11.779
Cbei_0386	glycosyl transferase, group 1		-5.493	-2.775	-8.785
Cbei_0421	UDP-N-acetylglucosamine 1-carboxyvinyltransferase		-2.78	-3.483	-7.081
Cbei_0653	polysaccharide deacetylase		-4.606	-2.702	-9.003
Cbei_1030	conserved hypothetical protein		-5.087	-4.68	-7.606
Cbei_1437	lipoprotein, putative		-3.359	-2.513	-7.109
Cbei_1526	ErfK/YbiS/YcfS/YnhG family protein		-3.251	-2.321	-4.962
Cbei_1727	UTP-glucose-1-phosphate uridylyltransferase		-1.956	-2.212	-2.054
Cbei_2533	NLP/P60 protein		-2.566	-2.881	-5.743
Cbei_2578	dTDP-glucose 4,6-dehydratase		-6.073	-4.351	-8.106
Cbei_2579	dTDP-4-dehydrorhamnose reductase		-5.447	-4.82	-7.722
Cbei_2585	glycosyl transferase, group 1		-7.362	-3.75	-8.397
Cbei_2589	glycosyl transferase, family 2		-8.213	-5.731	-9.129
Cbei_2591	glycosyl transferase, family 2		-7.133	-2.516	-10.631
Cbei_2601	dTDP-4-dehydrorhamnose 3,5-epimerase		-6.544	-3.189	-8.858
Cbei_2602	glucose-1-phosphate thymidylyltransferase		-7.192	-3.869	-9.054
Cbei_2604	glycosyl transferase, family 2		-3.629	-2.125	-6.136
Cbei_2949	uncharacterized conserved protein, CotF B.subtilis family		-6.003	-3.756	-3.615
Cbei_3267	glycoside hydrolase, family 25		-5.414	-5.084	-9.68
Cbei_4236	glycosyl transferase, family 2		-3.329	-2.883	-5.004
Cbei_4707	glycosyl transferase, family 2		-5.676	-3.68	-8.459
Cbei_4708	UDP-glucose 6-dehydrogenase		-6.472	-3.631	-9.324
Cbei_4709	UDP-3-O-(R-3-hydroxymyristoyl)-glucosamine N-acyltransferase		-2.22	-3.85	-5.465
Cbei_4712	NAD-dependent epimerase/dehydratase		-4.395	-3.622	-6.272
Cbei_4713	glycosyl transferase, group 1		-4.381	-4.414	-9.808
Cbei_4730	glycosyl transferase, group 1		-2.305	-3.984	-4.485
Cbei_4731	glycosyl transferase, family 2		-3.192	-3.815	-6.787
Cbei_4732	glycosyl transferase, group 1		-2.232	-4.071	-7.937
Cbei_4742	lipopolysaccharide biosynthesis protein		-3.73	-3.402	-7.942
Cbei_0393	cyanophycin synthetase		-6.162	-6.422	-8.137
Cbei_2532	peptidase U61, LD-carboxypeptidase A		-2.945	-2.342	-5.53
Cbei_3325	ABC transporter related		-3.114	-2.067	-2.833
Cbei_1458	pyruvate flavodoxin/ferredoxin oxidoreductase domain protein		-4.453	-3.687	-5.179
Cbei_2280	hybrid cluster protein		-3.67	-2.017	-3.869
Cbei_3013	hydrogenase (NiFe) small subunit HydA		-4.085	-4.978	-5.952
Cbei_3018	beta-lactamase domain protein		-3.659	-3.279	-6.673
Cbei_3020	carbon-monoxide dehydrogenase, catalytic subunit	Coos	-6.117	-4.815	-8.367
Cbei_3060	FAD dependent oxidoreductase		-3.81	-2.506	-5.283
Cbei_3496	FAD linked oxidase domain protein		-6.499	-4.35	-11.13
Cbei_4042	pyruvate flavodoxin/ferredoxin oxidoreductase domain protein		-4.658	-4.037	-5.786
Inorganic ion transport and metabolism
Cbei_1036	ATPase, P-type (transporting), HAD superfamily, subfamily IC		-2.324	-2.398	-5.801
Cbei_2913	Na+/H+ antiporter		-2.34	-2.144	-5.449
Cbei_3935	putative galactoside ABC transporter		-4.978	-3.717	-6.855
Cbei_3978	oligopeptide/dipeptide ABC transporter, ATPase subunit		-2.838	-4.992	-4.984
Cbei_3979	binding-protein-dependent transport systems inner membrane component		-2.552	-5.12	-4.127
Cbei_3980	binding-protein-dependent transport systems inner membrane component		-3.296	-4.112	-5.028
Cbei_4070	Mn2+/Fe2+ transporter, NRAMP family		-7.587	-5.276	-10.608
Cbei_1212	peptidase S14, ClpP		-2.542	-3.448	-6.649
Cbei_1291	lipase		-1.843	-1.658	-2.171
Cbei_1305	lysophospholipase		-4.367	-4.962	-4.443
Cbei_1737	NAD(P)H dehydrogenase (quinone)		-5.341	-4.083	-7.182
Cbei_3758	putative CoA-substrate-specific enzyme activase		-2.134	-1.697	-3.246
Cbei_0367	Endothelin-converting enzyme 1		-3.779	-4.432	-7.861
Cbei_0810	ATP-dependent protease		-2.763	-2.644	-7.101
Cbei_1515	protein of unknown function DUF255		-4.047	-3.21	-4.978
Cbei_3007	hydrogenase formation HypD protein		-3.702	-4.869	-4.064
Cbei_3009	(NiFe) hydrogenase maturation protein HypF		-3.586	-3.927	-7.184
Cbei_3035	alkyl hydroperoxide reductase/ Thiol specific antioxidant/ Mal allergen		-3.914	-2.5	-6.737
Cbei_0811	hypothetical protein		-1.807	-2.457	-5.852
Cbei_0878	Resolvase, N-terminal domain		-6.489	-5.93	-6.111
Cbei_0392	cyanophycinase		-6.196	-6.491	-7.938
Cbei_3246	Methyltransferase type 11		-4.06	-4.347	-4.57
Cbei_0566	putative serine protein kinase, PrkA		-6.596	-5.463	-6.115
Cbei_0601	conserved hypothetical protein		-3.815	-4.913	-7.257
Cbei_1424	serine/threonine kinase related protein		-4.729	-4.294	-10.239
Cbei_3074	PAS/PAC sensor hybrid histidine kinase		2.696	4.874	4.113
Cbei_3075	diguanylate cyclase/phosphodiesterase with PAS/PAC sensor(s)		3.307	5.222	4.639
Cbei_3076	diguanylate cyclase		3.634	5.271	4.195
Cbei_1904	transcriptional regulator, CarD family		-3.156	-3.343	-5.422
Cbei_2738	transcriptional antiterminator, BglG		-3.403	-3.219	-5.928
Cbei_3077	transcriptional regulator, TetR family		3.606	5.232	4.319
Cbei_4107	iron dependent repressor		-2.618	-3.753	-3.63
Unknown function
Cbei_0060	hypothetical protein		-5.69	-5.155	-6.594
Cbei_0061	conserved hypothetical protein		-5.57	-5.058	-7.13
Cbei_0300	hypothetical protein		-4.129	-5.451	-6.509
Cbei_0354	conserved hypothetical protein		-6.249	-5.579	-7.788
Cbei_0426	protein of unknown function DUF1256		-6.37	-5.303	-6.652
Cbei_0502	conserved hypothetical protein		-3.443	-4.503	-2.574
Cbei_0568	SpoVR family protein		-6.383	-5.334	-7.144
Cbei_0869	short-chain dehydrogenase/reductase SDR		-5.6	-2.023	-8.504
Cbei_0873	metallophosphoesterase		-2.145	-3.204	-5.59
Cbei_0882	hypothetical protein		-9.251	-7.393	-7.028
Cbei_0885	conserved hypothetical protein		-9.711	-8.058	-6.163
Cbei_0892	hypothetical protein		-5.836	-4.345	-6.716
Cbei_0898	hypothetical protein		-8.825	-7.12	-6.497
Cbei_0902	hypothetical protein		-9.971	-7.887	-6.718
Cbei_0924	hypothetical protein		-1.808	-2.491	-4.069
Cbei_0948	conserved hypothetical protein		-5.612	-5.471	-10.676
Cbei_1222	conserved hypothetical protein		-3.858	-3.128	-6.119
Cbei_1292	conserved hypothetical protein		-2.004	-1.802	-4.365
Cbei_1438	conserved hypothetical protein		-5.923	-2.04	-8.106
Cbei_1514	conserved hypothetical protein		-6.438	-3.793	-10.192
Cbei_1779	conserved hypothetical protein		-5.061	-2.675	-9.111
Cbei_1787	40-residue YVTN family beta-propeller repeat protein		-6.578	-1.751	-8.854
Cbei_1834	histidine triad (HIT) protein		-3.252	-2.243	2.132
Cbei_1859	short-chain dehydrogenase/reductase SDR		-3.554	-2.638	-6.525
Cbei_1881	glucose-inhibited division protein A		-6.421	-2.098	-8.454
Cbei_1882	hypothetical protein		-8.312	-3.954	-10.733
Cbei_1916	protein of unknown function DUF541		-7.362	-2.699	-8.094
Cbei_1919	protein of unknown function DUF871		-2.394	-1.53	-2.513
Cbei_1930	hypothetical protein		-8.234	-5.463	-11.559
Cbei_1931	conserved hypothetical protein		-4.214	-2.738	-7.387
Cbei_1933	glucose-inhibited division protein A		-2.768	-2.046	-5.145
Cbei_2071	hypothetical protein		-9.973	-6.064	-9.144
Cbei_2324	protein of unknown function DUF1540		-6.374	-5.121	-7.306
Cbei_2436	metal dependent phosphohydrolase		-2.372	-3.138	-2.07
Cbei_2437	protein of unknown function DUF503		-2.891	-2.971	-3.734
Cbei_2439	cytochrome b5		-5.426	-3.157	-5.739
Cbei_2462	Protein of unknown function DUF1722		-5.528	-6.417	-6.813
Cbei_2506	hypothetical protein		-4.342	-2.814	-10.34
Cbei_2582	hypothetical protein		-6.349	-5.16	-6.14
Cbei_2592	conserved hypothetical protein		-4.983	-4.388	-6.884
Cbei_2593	conserved hypothetical protein		-4.698	-4.838	-5.848
Cbei_2594	conserved hypothetical protein		-6.017	-4.815	-6.747
Cbei_2595	hypothetical protein		-6.202	-5.332	-6.554
Cbei_2596	WxcM domain protein, C-terminal domain protein		-6.416	-3.049	-9.214
Cbei_2600	conserved hypothetical protein		-6.592	-3.873	-8.855
Cbei_2603	Collagen triple helix repeat		-7.865	-5.545	-9.921
Cbei_2606	hypothetical protein		-7.744	-3.326	-8.894
Cbei_2660	protein of unknown function DUF871		-4.849	-5.177	-7.176
Cbei_2661	hypothetical protein		-5.214	-4.94	-7.271
Cbei_2837	plasmid pRiA4b ORF-3 family protein		-3.076	-3.246	-5.524
Cbei_2940	short-chain dehydrogenase/reductase SDR		-2.404	-3.328	-7.394
Cbei_2942	protein of unknown function DUF421		-3.836	-3.166	-6.504
Cbei_3010	conserved hypothetical protein, CF-29 family		-3.869	-4.291	-5.827
Cbei_3036	putative cell wall binding repeat-containing protein		-3.12	-3.115	-2.555
Cbei_3112	conserved hypothetical protein		-3.977	-3.962	-6.027
Cbei_3302	hypothetical protein		-6.379	-4.34	-8.026
Cbei_3326	protein of unknown function DUF975		-3.414	-1.928	-9.416
Cbei_3412	conserved hypothetical protein		-2.89	-2.544	-8.285
Cbei_3713	protein of unknown function DUF1540		-6.453	-4.818	-9.091
Cbei_3718	conserved hypothetical protein		-4.057	-5.112	-9.715
Cbei_4068	protein of unknown function DUF124		-3.414	-3.884	-4.616
Cbei_4071	uncharacterized membrane protein		-6.951	-5.368	-8.967
Cbei_4106	secreted protein containing uncharacterized conserved protein of ErfK family		-3.516	-4.503	-5.198
Cbei_4151	conserved hypothetical protein		-2.291	-1.835	-4.505
Cbei_4235	cellulose synthase subunit domain		-2.733	-2.129	-5.093
Cbei_4237	hypothetical protein		-3.718	-2.386	-5.745
Cbei_4239	transmembrane protein		-5.972	-3.355	-7.83
Cbei_4513	protein of unknown function DUF421		-6.534	-3.366	-7.973
Cbei_4733	hypothetical protein		-3.734	-3.917	-6.385
Cbei_0211	conserved hypothetical protein		-4.362	-4.343	-6.781
Cbei_0333	hypothetical protein		-1.997	-2.467	-9.55
Cbei_0420	hypothetical protein		-2.647	-2.767	-7.104
Cbei_0570	hypothetical protein		-6.413	-5.231	-7.371
Cbei_0880	hypothetical protein		-8.69	-6.563	-6.344
Cbei_0881	hypothetical protein		-8.479	-6.274	-6.307
Cbei_0883	hypothetical protein		-9.68	-8.214	-8.105
Cbei_0893	hypothetical protein		-6.114	-4.962	-7.468
Cbei_0896	hypothetical protein		-7.01	-4.729	-6.475
Cbei_0991	hypothetical protein		-5.651	-4.373	-8.954
Cbei_1304	hypothetical protein		-5.646	-5.331	-7.945
Cbei_1333	conserved hypothetical protein		-6.77	-4.897	-9.297
Cbei_1689	hypothetical protein		-6.937	-5.75	-5.755
Cbei_1863	hypothetical protein		-7.854	-6.208	-11.409
Cbei_1871	conserved hypothetical protein		-7.38	-5.242	-9.342
Cbei_1888	GRound-like protein		-8.401	-4.475	-7.658
Cbei_1915	hypothetical protein		-5.805	-4.287	-9.295
Cbei_2552	hypothetical protein		-6.356	-2.393	-9.003
Cbei_2553	hypothetical protein		-6.346	-3.264	-9.248
Cbei_2577	hypothetical protein		-2.613	-3.372	-7.066
Cbei_2581	conserved hypothetical protein		-6.843	-5.716	-9.188
Cbei_2584	hypothetical protein		-7.041	-5.797	-9.643
Cbei_2605	hypothetical protein		-8.358	-3.885	-11.151
Cbei_2607	hypothetical protein		-8.117	-4.335	-8.366
Cbei_2955	hypothetical protein		-6.163	-4.587	-4.746
Cbei_3021	hypothetical protein		-7.581	-7.345	-9.926
Cbei_3149	hypothetical protein		-4.629	-5.149	-10.928
Cbei_3266	hypothetical protein		-4.905	-3.624	-5.392
Cbei_3268	Holin, phage phi LC3		-8.772	-7.377	-10.905
Cbei_3283	hypothetical protein		-7.077	-5.379	-10.04
Cbei_3723	hypothetical protein		-5.309	-4.364	-9.643
Cbei_3934	hypothetical protein		-6.889	-4.358	-7.613
Cbei_3949	hypothetical protein		-4.65	-3.697	-7.17
Cbei_3995	hypothetical protein		-5.686	-4.787	-7.031
Cbei_4137	hypothetical protein		-6.974	-6.926	-9.285
Cbei_4417	hypothetical protein		-3.488	-3.006	-5.328
Cbei_4418	RNA-binding region-containing protein (RNP-1)		-5.955	-2.254	-9.631
Cbei_4613	hypothetical protein		-7.049	-4.565	-8.36
Cbei_4714	hypothetical protein		-6.62	-5.826	-10.177
Cbei_4769	hypothetical protein		-7.65	-3.072	-9.732
Cbei_4770	hypothetical protein		-5.972	-2.951	-8.827

## Sheet: Supplementary Table 5
Gene ID	Predicted function	Putative encoded protein	log2 fold change in expression ΔspoIIE_C5 relative to the WT	Class Description	COG process
11 h
Cbei_0097	Sporulation stage II, protein E	SpoIIE	-11.97	Signal transduction mechanisms	Cellular processes and signaling
Cbei_0423	peptidase M23B	SpoIIQ	-9.248	Function unknown	Poorly characterized
Cbei_0424	Sporulation stage III, transcriptional regulator SpoIIID	SpoIIID	-9.059	Transcription	Information storage and processing
Cbei_0883	hypothetical protein		-8.214
Cbei_0885	conserved hypothetical protein		-8.058	Function unknown	Poorly characterized
Cbei_0902	hypothetical protein		-7.887	Function unknown	Poorly characterized
Cbei_1877	Sporulation protein YtfJ	YtfJ	-7.47	Function unknown	Poorly characterized
Cbei_0882	hypothetical protein		-7.393	Function unknown	Poorly characterized
Cbei_3268	Holin, phage phi LC3		-7.377
Cbei_3021	hypothetical protein		-7.345
Cbei_0898	hypothetical protein		-7.12	Function unknown	Poorly characterized
Cbei_4137	hypothetical protein		-6.926
Cbei_1817	conserved hypothetical protein		-6.919	Function unknown	Poorly characterized
Cbei_0886	transcriptional regulator, XRE family		-6.803	Transcription	Information storage and processing
Cbei_4025	conserved hypothetical protein		-6.739	Lipid transport and metabolism	Metabolism
Cbei_0520	competence protein ComEA helix-hairpin-helix repeat protein		-6.727	Replication, recombination and repair	Information storage and processing
Cbei_1282	Di-trans-poly-cis-decaprenylcistransferase		-6.683	Lipid transport and metabolism	Metabolism
Cbei_2404	TPR repeat-containing protein		-6.592	Function unknown	Poorly characterized
Cbei_0880	hypothetical protein		-6.563
Cbei_0392	cyanophycinase		-6.491	Secondary metabolites biosynthesis, transport and catabolism	Metabolism
Cbei_0393	cyanophycin synthetase		-6.422	Coenzyme transport and metabolism	Metabolism
Cbei_2462	Protein of unknown function DUF1722		-6.417	Function unknown	Poorly characterized
Cbei_4026	conserved hypothetical protein		-6.347	Lipid transport and metabolism	Metabolism
Cbei_0881	hypothetical protein		-6.274
Cbei_0015	ErfK/YbiS/YcfS/YnhG family protein		-6.235	Cell wall/membrane/envelope biogenesis	Cellular processes and signaling
Cbei_1863	hypothetical protein		-6.208
Cbei_0119	Zn-dependent hydrolase of the metallo-beta-lactamase superfamily		-6.072	Function unknown	Poorly characterized
Cbei_2071	hypothetical protein		-6.064	Function unknown	Poorly characterized
Cbei_0111	amidohydrolase-like protein		-6.045	Amino acid transport and metabolism	Metabolism
Cbei_1818	permease		-5.987	Function unknown	Poorly characterized
Cbei_0571	conserved hypothetical protein		-5.967	Function unknown	Poorly characterized
Cbei_0878	Resolvase, N-terminal domain		-5.93	Replication, recombination and repair	Information storage and processing
Cbei_3269	conserved hypothetical protein		-5.857	Function unknown	Poorly characterized
Cbei_0850	Spore coat protein CotS	CotS	-5.847	Cell wall/membrane/envelope biogenesis	Cellular processes and signaling
Cbei_4714	hypothetical protein		-5.826
Cbei_4027	putative CoA-substrate-specific enzyme activase		-5.82	Lipid transport and metabolism	Metabolism
Cbei_2584	hypothetical protein		-5.797
Cbei_1689	hypothetical protein		-5.75
Cbei_1816	cobalamin synthesis protein, P47K		-5.736	Function unknown	Poorly characterized
Cbei_2589	glycosyl transferase, family 2		-5.731	Cell wall/membrane/envelope biogenesis	Cellular processes and signaling
Cbei_2581	conserved hypothetical protein		-5.716
Cbei_1783	Integral membrane protein TerC		-5.677	Inorganic ion transport and metabolism	Metabolism
Cbei_3759	FAD linked oxidase domain protein		-5.613	Energy production and conversion	Metabolism
Cbei_0354	conserved hypothetical protein		-5.579	Function unknown	Poorly characterized
Cbei_0569	Rubrerythrin		-5.571	Energy production and conversion	Metabolism
Cbei_0567	Sporulation protein YhbH	YhbH	-5.56	Function unknown	Poorly characterized
Cbei_1115	RNA polymerase, sigma 28 subunit, FliA/WhiG family	σK	-5.548	Transcription	Information storage and processing
Cbei_2603	Collagen triple helix repeat		-5.545	Function unknown	Poorly characterized
Cbei_2294	hypothetical protein		-5.525
Cbei_4878	single-strand binding protein		-5.514	Replication, recombination and repair	Information storage and processing
23 h
Cbei_3111	small acid-soluble spore protein, alpha/beta type	Sasp	-13.271	Function unknown	Poorly characterized
Cbei_0382	glycosyl transferase, group 1		-11.779	Cell wall/membrane/envelope biogenesis	Cellular processes and signaling
Cbei_1568	Sporulation protein YtxC	YtxC	-11.715	Function unknown	Poorly characterized
Cbei_1930	hypothetical protein		-11.559	Function unknown	Poorly characterized
Cbei_2471	small acid-soluble spore protein, alpha/beta type	Sasp	-11.503	Function unknown	Poorly characterized
Cbei_1863	hypothetical protein		-11.409
Cbei_2605	hypothetical protein		-11.151
Cbei_3496	FAD linked oxidase domain protein		-11.13	Energy production and conversion	Metabolism
Cbei_3149	hypothetical protein		-10.928
Cbei_3275	small acid-soluble spore protein, alpha/beta type	Sasp	-10.919	Function unknown	Poorly characterized
Cbei_3268	Holin, phage phi LC3		-10.905
Cbei_1882	hypothetical protein		-10.733	Function unknown	Poorly characterized
Cbei_0948	conserved hypothetical protein		-10.676	Function unknown	Poorly characterized
Cbei_2591	glycosyl transferase, family 2		-10.631	Cell wall/membrane/envelope biogenesis	Cellular processes and signaling
Cbei_4070	Mn2+/Fe2+ transporter, NRAMP family		-10.608	Inorganic ion transport and metabolism	Metabolism
Cbei_2506	hypothetical protein		-10.34	Function unknown	Poorly characterized
Cbei_4612	Coat F domain protein		-10.309	Cell wall/membrane/envelope biogenesis	Cellular processes and signaling
Cbei_5052	conserved hypothetical protein		-10.304	Function unknown	Poorly characterized
Cbei_1424	serine/threonine kinase related protein		-10.239	Signal transduction mechanisms	Cellular processes and signaling
Cbei_1514	conserved hypothetical protein		-10.192	Function unknown	Poorly characterized
Cbei_4714	hypothetical protein		-10.177
Cbei_0385	Spore coat protein CotS	CotS	-10.106	Cell wall/membrane/envelope biogenesis	Cellular processes and signaling
Cbei_3283	hypothetical protein		-10.04
Cbei_3285	conserved hypothetical protein		-9.979	Function unknown	Poorly characterized
Cbei_2345	small acid-soluble spore protein, alpha/beta type	Sasp	-9.971	Function unknown	Poorly characterized
Cbei_3021	hypothetical protein		-9.926
Cbei_2603	Collagen triple helix repeat		-9.921	Function unknown	Poorly characterized
Cbei_2587	Collagen triple helix repeat	Bcla	-9.907	Function unknown	Poorly characterized
Cbei_1334	hypothetical protein		-9.9
Cbei_3933	hypothetical protein		-9.839
Cbei_4713	glycosyl transferase, group 1		-9.808	Cell wall/membrane/envelope biogenesis	Cellular processes and signaling
Cbei_4769	hypothetical protein		-9.732
Cbei_3718	conserved hypothetical protein		-9.715	Function unknown	Poorly characterized
Cbei_4767	hypothetical protein		-9.701
Cbei_3267	glycoside hydrolase, family 25		-9.68	Cell wall/membrane/envelope biogenesis	Cellular processes and signaling
Cbei_2069	manganese containing catalase	CotjC	-9.66	Inorganic ion transport and metabolism	Metabolism
Cbei_2070	spore coat peptide assembly protein CotJB	CotjB	-9.646	Function unknown	Poorly characterized
Cbei_2584	hypothetical protein		-9.643
Cbei_3723	hypothetical protein		-9.643
Cbei_4418	RNA-binding region-containing protein (RNP-1)		-9.631
Cbei_0333	hypothetical protein		-9.55
Cbei_4611	hypothetical protein		-9.515
Cbei_2597	DegT/DnrJ/EryC1/StrS aminotransferase		-9.505	Amino acid transport and metabolism	Metabolism
Cbei_2586	glycosyl transferase, family 2		-9.498	Cell wall/membrane/envelope biogenesis	Cellular processes and signaling
Cbei_2590	Capsular polysaccharide biosynthesis -like protein		-9.444	Function unknown	Poorly characterized
Cbei_3326	protein of unknown function DUF975		-9.416	Function unknown	Poorly characterized
Cbei_4922	conserved hypothetical protein		-9.387	Function unknown	Poorly characterized
Cbei_1342	hypothetical protein		-9.377
Cbei_1871	conserved hypothetical protein		-9.342
Cbei_0097	Sporulation stage II, protein E	SpoIIE	-9.329	Signal transduction mechanisms	Cellular processes and signaling

## Sheet: Supplementary Table 6
Gene ID	Predicted function	Putative encoded protein	log2 fold change in expression ΔspoIIE_C5 relative to the WT
			4 h	11 h	23 h
Sporulation initiation
Cbei_0135	RNA polymerase, sigma-24 subunit, ECF subfamily, sigH	σH	0.29	0.205	0.269
Cbei_0361	Multi-sensor signal transduction histidine kinase		0.497	0.375	1.226
Cbei_1187	GTP-sensing transcriptional pleiotropic repressor CodY	CodY	0.281	0.17	-0.175
Cbei_1553	Multi-sensor signal transduction histidine kinase		0.339	0.638	0.651
Cbei_1712	Response regulator receiver protein	Spo0A	0.574	-0.451	-0.284
Cbei_2087	Integral membrane sensor signal transduction histidine kinase		-0.115	0.382	-0.753
Cbei_2435	PAS/PAC sensor signal transduction histidine kinase		0.284	0.361	-0.547
Cbei_3169	Multi-sensor signal transduction histidine kinase		0.97	0.633	-1.126
Cbei_3375	Transcriptional regulator, AbrB family		1.397	1.057	1.861
Cbei_4484	Multi-sensor signal transduction histidine kinase		0.562	0.757	-0.549
Cbei_4885	Transcriptional regulator, AbrB family	AbrB	0.442	2.09	-2.747
Cbei_4925	PAS/PAC sensor signal transduction histidine kinase		0.235	0.246	-0.107
Spo0A regulon
Cbei_0097	Sporulation stage II, protein E	SpoIIE	-9.509	-11.97	-9.329
Cbei_0812	Anti-sigma-factor antagonist	SpoIIAA	-2.107	0.121	0.536
Cbei_0813	Putative anti-sigma regulatory factor, serine/threonine protein kinase	SpoIIAB	-1.335	0.161	0.538
Cbei_0814	RNA polymerase, sigma 28 subunit, FliA/WhiG family	σF	-1.769	0.226	-0.554
Cbei_1119	peptidase U4, sporulation factor SpoIIGA	SpoIIGA	-2.685	0.264	-1.473
Cbei_1120	RNA polymerase, sigma 28 subunit, FliA/WhiG family	σE	-2.595	0.216	-1.405
σF regulon
Cbei_0112	Hypothetical protein	CsfB	-1.509	-4.23	-3.879
Cbei_0199	Cell wall hydrolase, SleB	SleB	-4.857	-5.488	-8.125
Cbei_0395	Sporulation stage II, protein R	SpoIIR	-0.522	-1.378	-0.906
Cbei_0423	Peptidase M23B	SpoIIQ	-9.29	-9.248	-8.603
Cbei_0822	Spore protease	GpR	-1.613	-0.645	-3.599
Cbei_0823	Stage II sporulation P family protein	SpoIIP	-6.773	-5.354	-4.792
Cbei_1121	RNA polymerase, sigma 28 subunit, FliA/WhiG family	σG	-3.27	-0.147	-1.64
Cbei_1711	Peptidase S55, sporulation stage IV, protein B	SpoIVB	-4.839	-2.664	-8.816
Cbei_1874	Serine-type D-Ala-D-Ala carboxypeptidase	DacF	-5.075	-0.408	-8.428
σE regulon
Cbei_0299	Polysaccharide deacetylase	YfjS	0.099	-1.98	-2.598
Cbei_0188	N-acetylmuramoyl-L-alanine amidase CwlD	CwlD	-1.226	-1.36	-3.399
Cbei_0391	Peptidoglycan-binding LysM	SipL	-2.487	-2.232	-5.719
Cbei_0422	Sporulation stage II, protein D firmicutes	SpoIID	-4.334	-4.708	-6.025
Cbei_0424	Sporulation stage III, transcriptional regulator SpoIIID	SpoIIID	-8.113	-9.059	-7.743
Cbei_0567	Sporulation protein YhbH	YhbH	-6.669	-5.56	-6.244
Cbei_0653	Polysaccharide deacetylase		-4.606	-2.702	-9.003
Cbei_0840	Protein of unknown function DUF1429	YqfC	-3.235	-3.435	-3.976
Cbei_0841	Putative stage IV sporulation YqfD	YqfD	-1.783	-1.959	-2.528
Cbei_1115	RNA polymerase, sigma 28 subunit, FliA/WhiG family	σK	-4.745	-5.548	-9.086
Cbei_1122	Sporulation protein YlmC/YmxH	YlmC/YmxH	-3.726	-0.429	-2.831
Cbei_1136	Sporulation stage IV, protein A	SpoIVA	-5.799	-4.954	-5.165
Cbei_1162	Sporulation integral membrane protein YlbJ	YlbJ	-2.502	-3.122	-3.334
Cbei_1210	Sporulation protein YlmC/YmxH	YlmC/YmxH	-2.997	-2.435	-3.028
Cbei_1211	Aspartate kinase	DapG	-1.912	-2.953	-3.547
Cbei_1389	Sporulation stage V, protein B	SpoVB	-5.747	-5.481	-7.141
Cbei_1568	Sporulation protein YtxC	YtxC	-5.425	-4.448	-11.715
Cbei_1578	Stage V sporulation protein D	SpoVD	-0.285	0.065	0.078
Cbei_1579	Stage V sporulation protein D	SpoVD	-1.047	0.182	-0.256
Cbei_1583	Stage V sporulation protein E	SpoVE	-0.371	-1.121	-0.219
Cbei_1692	Sporulation stage III, protein AA	SpoIIIAA	-4.972	-5.432	-3.539
Cbei_1693	Sporulation stage III, protein AB	SpoIIIAB	-5.649	-5.37	-5.24
Cbei_1694	Stage III sporulation AC family protein	SpoIIIAC	-7.054	-5.065	-4.06
Cbei_1695	Sporulation stage III, protein AD	SpoIIIAD	-6.093	-5.21	-5.48
Cbei_1696	Sporulation stage III, protein AE	SpoIIIAE	-5.441	-4.824	-3.876
Cbei_1697	Sporulation stage III, protein AF	SpoIIIAF	-5.852	-5.038	-4.436
Cbei_1698	Sporulation stage III, protein AG	SpoIIIAG	-6.113	-4.882	-3.672
Cbei_1699	Stage III sporulation protein AH	SpoIIIAH	-5.663	-5.19	-4.345
Cbei_1789	Polysaccharide deacetylase	YfjS	-6.485	-4.661	-5.232
Cbei_1962	Sporulation stage II, protein M	SpoIIM	-6.371	-4.553	-7.706
Cbei_1964	Polysaccharide deacetylase		-0.482	1.437	-1.906
Cbei_2146	Polysaccharide deacetylase		-0.338	-1.335	-2.999
Cbei_3290	Polysaccharide deacetylase		-2.657	-0.893	-4.118
Cbei_3353	Glycoside hydrolase, family 18	SpoL	-4.392	-2.159	-7.054
Cbei_4229	Sporulation protein YunB	YunB	-2.536	-2.498	-5.175
Cbei_4866	Carboxyl-terminal protease	YzbD	0.371	-0.311	-0.245
σG regulon
Cbei_0088	Transcriptional regulator, AbrB family	SpoVT	-4.525	-4.955	-9.107
Cbei_0474	Small acid-soluble spore protein, alpha/beta type	Ssp	-4.127	-2.484	-9.12
Cbei_0815	Sporulation stage V, protein AC	SpoVAC	-3.928	0.715	-5.203
Cbei_0816	Stage V sporulation AD family protein	SpoVAD	-3.249	0.626	-4.835
Cbei_0817	Sporulation stage V, protein AE	SpoVAE	-4.775	0.045	-7.075
Cbei_1033	Stage V sporulation protein AF	spoVAF	-3.963	-2.711	-7.937
Cbei_1447	Small acid-soluble spore protein, alpha/beta type	Ssp	-5.663	-1.423	-8.642
Cbei_1798	Small acid-soluble spore protein	Ssp	-4.982	-3.731	-6.165
Cbei_1877	Sporulation protein YtfJ	YtfJ	-4.834	-7.47	-8.328
Cbei_1878	Conserved hypothetical protein		-4.55	-4.59	-3.569
Cbei_1879	Serine-type D-Ala-D-Ala carboxypeptidase	DacB	-1.463	0.369	-3.525
Cbei_2225	Small acid-soluble spore protein, alpha/beta type	Ssp	-6.22	-0.854	-4.918
Cbei_2345	Small acid-soluble spore protein, alpha/beta type	Ssp	-8.598	-3.62	-9.971
Cbei_2470	Small acid-soluble spore protein, alpha/beta type	Ssp	-4.161	-0.609	-4.558
Cbei_2471	Small acid-soluble spore protein, alpha/beta type	Ssp	-6.751	-3.817	-11.503
Cbei_3080	Small acid-soluble spore protein, alpha/beta type	Ssp	-2.734	-0.097	-6.382
Cbei_3111	Small acid-soluble spore protein, alpha/beta type	Ssp	-7.494	-2.229	-13.271
Cbei_3250	Small acid-soluble spore protein, alpha/beta type	Ssp	-4.923	-1.806	-9.638
Cbei_3264	Small acid-soluble spore protein, alpha/beta type	Ssp	-5.7	-0.973	-9.268
Cbei_3275	small acid-soluble spore protein, alpha/beta type	Ssp	-5.705	-2.863	-10.919
σK regulon
Cbei_0036	Peptidoglycan-binding domain 1 protein		-2.989	-0.743	-6.998
Cbei_0051	Nucleoside recognition domain protein	SmpA	-3.288	-4.359	-5.064
Cbei_0052	Nucleoside recognition domain protein	SmpB	-3.398	-4.404	-4.443
Cbei_0093	YabP family protein	YabP	-2.898	-3.394	-6.139
Cbei_0094	Spore cortex biosynthesis protein YabQ	YabQ	-2.011	-3.115	-5.792
Cbei_0388	Peptidase U57, YabG	YabG	-5.38	-4.172	-7.372
Cbei_2069	Manganese containing catalase	CotJC	-8.036	-4.035	-9.66
Cbei_2070	Spore coat peptide assembly protein CotJB	CotjB	-9.164	-3.558	-9.646
Cbei_2587	Collagen triple helix repeat	BlcA	-5.653	-6.543	-9.907
Cbei_2588	Collagen triple helix repeat	BlcA	-4.099	-4.362	-9.064
Cbei_3245	Peptidoglycan-binding domain 1 protein		-4.621	-4.542	-6.661
Cbei_3970	Small acid-soluble spore H family protein	SspH	-5.058	-5.31	-5.844
Cbei_4610	Small acid-soluble spore protein Tlp	SspT	-5.164	-0.841	-7.242
Cbei_4611	Hypothetical protein	YraG	-7.718	-2.001	-9.515
Cbei_4612	Coat F domain protein	YraD	-7.299	-4.131	-10.309
Cbei_4613	Hypothetical protein	YraG	-7.049	-4.565	-8.36
Cbei_4614	Coat F domain protein	YraD	-5.197	-3.794	-8.689
Cbei_4834	Catalase	CotJC	-5.501	-3.003	-8.205
Unknown regulon
Cbei_0383	Spore coat protein CotS	CotS	-4.065	-0.467	-7.622
Cbei_0384	Hypothetical protein		-4.823	-1.561	-7.937
Cbei_0385	Spore coat protein CotS	CotS	-4.757	-3.291	-10.106
Cbei_0386	Glycosyl transferase, group 1		-5.493	-2.775	-8.785
Cbei_0387	Spore coat protein CotS	CotS	-5.891	-5.158	-5.634
Cbei_0429	Helicase, RecD/TraA family		0.445	0.264	-0.15
Cbei_0850	Spore coat protein CotS	CotS	-5.379	-5.847	-6.467
Cbei_0857	Peptidase S8 and S53, subtilisin, kexin, sedolisin		-3.334	-3.671	-6.117
Cbei_0858	Peptidase S8 and S53, subtilisin, kexin, sedolisin		-3.405	-3.275	-5.618
Cbei_1123	ATP-cone domain protein		-1.109	0.068	-1.574
Cbei_1124	Protein of unknown function DUF152		-0.248	0.071	1.356
Cbei_1218	Stage V sporulation protein S	SpoVS	0.109	0.273	0.438
Cbei_1274	Sporulation protein YtaF	YtaF	-7.112	-2.635	-9.094
Cbei_1329	Sporulation protease LonB	LonB	-1.363	-2.579	-2.175
Cbei_1436	Peptidase S8 and S53, subtilisin, kexin, sedolisin		-1.608	-1.718	-1.454
Cbei_1454	Peptidase S8 and S53, subtilisin, kexin, sedolisin		-2.582	-3.244	-4.443
Cbei_1456	Peptidase S8 and S53, subtilisin, kexin, sedolisin		-1.623	0.138	-0.062
Cbei_1854	Peptidase S8 and S53, subtilisin, kexin, sedolisin		-3.962	-3.103	-3.989
Cbei_3061	Conserved hypothetical protein		-4.292	-1.156	-7.966
Cbei_3962	Peptidase S8 and S53, subtilisin, kexin, sedolisin		1.327	0.621	1.933
Cbei_4922	Conserved hypothetical protein		-6.514	-4.202	-9.387
Cbei_5067	Peptidase S8 and S53, subtilisin, kexin, sedolisin		-0.808	0.574	-6.74
Cbei_5080	Sporulation protease LonC	Lonc	0.177	0.56	0.452

## Sheet: Supplementary Table 7
Gene_ID	Predicted function	Putative encoded protein	log2 fold change in expression ΔspoIIE_C5 relative to the WT
			4 h	11 h	23 h
Stress response
Cbei_0328	Chaperonin Cpn10	GroE	2.22	-1.794	2.035
Cbei_0329	Chaperonin GroEL	GroL	1.473	-0.707	2.17
Cbei_0831	Chaperone protein DnaJ	DnaJ	1.409	0.107	2.279
Cbei_4834	Catalase		-5.501	-3.003	-8.205
Cbei_0288	Rubrerythrin		1.068	-0.242	2.008
Cbei_0569	Rubrerythrin		-7.025	-5.571	-7.549
Cbei_1416	Rubrerythrin		0.94	0.251	1.635
Cbei_2325	Rubrerythrin		-5.343	-4.618	-7.704
Cbei_2490	Rubrerythrin		1.236	1.93	1.537
Cbei_3257	Rubrerythrin		-5.503	0.041	-6.596
Cbei_1507	Superoxide dismutase		-0.17	-0.396	-2.932
Cbei_1856	Superoxide dismutase		-4.265	-1.238	-6.699
Cbei_1800	Hsp33 protein		0.305	-0.471	-1.802
Cbei_4123	Heat shock protein Hsp20		1.924	-1.233	1.113
Cbei_0828	Heat-inducible transcription repressor HrcA	HrcA	2.126	0.127	1.249
Cbei_1254	ATP-dependent protease La	LonA	1.749	-1.139	0.663
Cbei_4002	Endopeptidase Clp	ClpP	3.913	0.101	0.71
Cbei_0123	ATPase AAA-2 domain protein	ClpC	0.649	-1.512	1.476
Cbei_0645	ATPase AAA-2 domain protein	Clpc	1.815	-0.045	2.021
Cell wall/membrane/envelope biogenesis
Cbei_0015	ErfK/YbiS/YcfS/YnhG family protein		-5.672	-6.235	-7.081
Cbei_0073	Glycosyl transferase, family 2		0.152	-0.604	-1.782
Cbei_0089	Polysaccharide biosynthesis protein		-2.877	-4.467	-6.097
Cbei_0246	Glucosamine--fructose-6-phosphate aminotransferase, isomerizing		0.359	-0.718	-4.268
Cbei_0261	Efflux transporter, RND family, MFP subunit		2.608	-1.777	0.693
Cbei_0318	Mannose-1-phosphate guanylyltransferase (GDP)		-3.923	-1.667	-2.693
Cbei_0382	Glycosyl transferase, group 1		-6.265	-3.442	-11.779
Cbei_0400	Monogalactosyldiacylglycerol synthase		-0.463	0.101	-2.495
Cbei_0421	UDP-N-acetylglucosamine 1-carboxyvinyltransferase		-2.78	-3.483	-7.081
Cbei_0581	D-alanine--D-alanine ligase		0.384	-0.085	-1.659
Cbei_0591	Glycoside hydrolase, family 25		-3.113	-0.119	-6.271
Cbei_0931	Glycoside hydrolase, family 25		-4.652	-3.837	-3.416
Cbei_0988	Glycosyl transferase, group 1		0.207	0.409	1.577
Cbei_1030	Conserved hypothetical protein		-5.087	-4.68	-7.606
Cbei_1114	Penicillin-binding protein, transpeptidase		-2.012	-5.099	-5.671
Cbei_1437	Lipoprotein, putative		-3.359	-2.513	-7.109
Cbei_1526	ErfK/YbiS/YcfS/YnhG family protein		-3.251	-2.321	-4.962
Cbei_1650	Phage tail tape measure protein, TP901 family		1.977	0.468	1.778
Cbei_1716	Hypothetical protein		-2.039	-2.039	-6.16
Cbei_1725	Glycosyl transferase, family 39		0.472	0.782	2.089
Cbei_1727	UTP-glucose-1-phosphate uridylyltransferase		-1.956	-2.212	-2.054
Cbei_2258	Sterol 3-beta-glucosyltransferase		-2	-0.731	-1.589
Cbei_2287	ErfK/YbiS/YcfS/YnhG family protein		-0.495	-1.182	-5.202
Cbei_2434	NLP/P60 protein		-4.307	-4.656	-4.178
Cbei_2533	NLP/P60 protein		-2.566	-2.881	-5.743
Cbei_2578	dTDP-glucose 4,6-dehydratase		-6.073	-4.351	-8.106
Cbei_2579	dTDP-4-dehydrorhamnose reductase		-5.447	-4.82	-7.722
Cbei_2585	Glycosyl transferase, group 1		-7.362	-3.75	-8.397
Cbei_2586	Glycosyl transferase, family 2		-7.453	-3.764	-9.498
Cbei_2589	Glycosyl transferase, family 2		-8.213	-5.731	-9.129
Cbei_2591	Glycosyl transferase, family 2		-7.133	-2.516	-10.631
Cbei_2601	dTDP-4-dehydrorhamnose 3,5-epimerase		-6.544	-3.189	-8.858
Cbei_2602	Glucose-1-phosphate thymidylyltransferase		-7.192	-3.869	-9.054
Cbei_2604	Glycosyl transferase, family 2		-3.629	-2.125	-6.136
Cbei_2662	Cell wall hydrolase/autolysin		-4.433	-5.193	-5.476
Cbei_2702	Efflux transporter, RND family, MFP subunit		-2.858	-2.367	-2.344
Cbei_2825	Beta and gamma crystallin		0.804	0.209	-2.07
Cbei_2923	Secretion protein HlyD family protein		0.769	0.746	4.061
Cbei_2949	Uncharacterized conserved protein, CotF B.subtilis family		-6.003	-3.756	-3.615
Cbei_3267	Glycoside hydrolase, family 25		-5.414	-5.084	-9.68
Cbei_3673	Penicillin amidase		-5.498	-1.414	-7.146
Cbei_4023	Cell wall hydrolase/autolysin		-0.082	1.091	2.073
Cbei_4029	Glycosyl transferase, family 39		-1.228	-1.691	-5.22
Cbei_4121	Cyclopropane-fatty-acyl-phospholipid synthase		-1.253	-2.049	-1.78
Cbei_4236	Glycosyl transferase, family 2		-3.329	-2.883	-5.004
Cbei_4339	Nucleotidyl transferase		4.097	-1.958	0.702
Cbei_4505	Putative cell wall binding repeat-containing protein		-1.161	-3.502	-2.623
Cbei_4556	Sugar isomerase (SIS)		1.055	0.913	1.62
Cbei_4626	Glycosyl transferase, group 1		0.54	-0.448	-2.018
Cbei_4666	Lytic transglycosylase, catalytic		1.436	0.247	1.799
Cbei_4698	Cell wall hydrolase/autolysin		2.628	2.512	2.24
Cbei_4699	Cell wall hydrolase/autolysin		1.58	1.323	1.762
Cbei_4707	Glycosyl transferase, family 2		-5.676	-3.68	-8.459
Cbei_4708	UDP-glucose 6-dehydrogenase		-6.472	-3.631	-9.324
Cbei_4709	UDP-3-O-(R-3-hydroxymyristoyl)-glucosamine N-acyltransferase		-2.22	-3.85	-5.465
Cbei_4712	NAD-dependent epimerase/dehydratase		-4.395	-3.622	-6.272
Cbei_4713	Glycosyl transferase, group 1		-4.381	-4.414	-9.808
Cbei_4715	Hypothetical protein		-3.067	-1.484	-8.173
Cbei_4718	Putative cell wall binding repeat-containing protein		0.169	2.389	-1.698
Cbei_4719	Putative cell wall binding repeat-containing protein		-0.444	2.165	2.077
Cbei_4727	Putative cell wall binding repeat-containing protein		1.194	1.635	-2.133
Cbei_4729	Polysaccharide biosynthesis protein		-1.885	-2.9	-5.519
Cbei_4730	Glycosyl transferase, group 1		-2.305	-3.984	-4.485
Cbei_4731	Glycosyl transferase, family 2		-3.192	-3.815	-6.787
Cbei_4732	Glycosyl transferase, group 1		-2.232	-4.071	-7.937
Cbei_4735	Glycosyl transferase, group 1		-1.868	-2.684	-3.881
Cbei_4740	Protein-tyrosine-phosphatase		-2.283	-2.788	-4.996
Cbei_4741	Capsular exopolysaccharide family		-3.479	-2.516	-4.993
Cbei_4742	Lipopolysaccharide biosynthesis protein		-3.73	-3.402	-7.942
Cbei_4752	dTDP-4-dehydrorhamnose reductase		0.766	0.827	1.986
Cbei_4755	dTDP-4-dehydrorhamnose 3,5-epimerase		1.283	-0.046	1.569
Cbei_4756	Glucose-1-phosphate thymidylyltransferase		1.25	0.151	1.665
Cbei_4858	UDP-N-acetylenolpyruvoylglucosamine reductase		0.117	-0.746	-3.06
Cbei_4874	Uncharacterized secreted protein		-0.854	-0.355	-2.507
Cbei_4961	Large conductance mechanosensitive channel protein		-2.81	-2.668	-6.215
Cbei_4991	Phage minor structural protein		0.043	-1.701	-1.818
Signal transduction mechanisms and motility
Cbei_1594	MotA/TolQ/ExbB proton channel	MotA	1.857	-0.019	0.855
Cbei_1815	Putative cell wall binding repeat-containing protein		1.104	0.986	2.664
Cbei_3207	Putative cell wall binding repeat-containing protein		0.167	0.625	-2.703
Cbei_3237	Putative cell wall binding repeat-containing protein		-0.545	-0.29	-2.21
Cbei_3407	Putative cell wall binding repeat-containing protein		-0.268	2.867	-0.905
Cbei_3954	Putative CheW protein	CheW	-2.552	-0.136	-7.431
Cbei_4018	Putative CheW protein	CheW	-1.024	3.127	0.489
Cbei_4019	CheA signal transduction histidine kinase	CheA	-0.82	3.347	0.558
Cbei_4184	Putative CheW protein	CheW	-1.306	2.266	-3.956
Cbei_4253	Flagellar biosynthesis protein FlhA	FlhA	0.893	1.546	0.875
Cbei_4257	Putative flagellar formation protein		-0.469	1.699	-0.851
Cbei_4259	Flagellar FlbD family protein	FlbD	1.064	2.131	0.656
Cbei_4260	Protein of unknown function DUF1078 domain protein		1.393	1.479	2.058
Cbei_4262	Flagellar hook capping protein		0.996	1.731	1.597
Cbei_4264	Flagellar export protein FliJ	FliJ	0.485	2.243	1.062
Cbei_4266	Flagellar biosynthesis/type III secretory pathway -like protein		0.636	2.257	-1.896
Cbei_4267	Flagellar motor switch protein FliG	FliG	1.116	2.15	-2.24
Cbei_4268	Flagellar M-ring protein FliF	FliF	0.666	2.015	-2.132
Cbei_4269	Flagellar hook-basal body complex subunit FliE	FliE	0.276	2.209	1.754
Cbei_4270	Flagellar basal-body rod protein FlgC	FlgC	1.091	2.218	1.215
Cbei_4271	Flagellar basal-body rod protein FlgB	FlgB	0.224	1.566	-0.34
Cbei_4272	OmpA/MotB domain protein	MotB	1.273	2.026	0.565
Cbei_4273	MotA/TolQ/ExbB proton channel	MotA	1.125	2.846	0.884
Cbei_4274	Flagellin domain protein		1.002	1.203	-2.665
Cbei_4306	CheC, inhibitor of MCP methylation	CheC	1.317	0.843	1.957
Cbei_4307	CheA signal transduction histidine kinase	CheA	0.488	0.793	1.578
Cbei_4309	Response regulator receiver modulated CheB methylesterase	CheB	0.924	1.191	1.568
Cbei_4826	Response regulator receiver modulated CheB methylesterase	CheB	0.63	2.994	2.294
Cbei_4827	Protein-glutamate O-methyltransferase		-0.118	3.41	1.629
Cbei_4829	CheA signal transduction histidine kinase	CheA	-0.384	3.868	0.757
Cbei_4830	OmpA/MotB domain protein	MotB	0.969	1.78	2.153
Cbei_4831	MotA/TolQ/ExbB proton channel	MotA	1.126	2.132	1.478
Cbei_4958	CheC domain protein	CheC	1.38	1.456	2.182

## Sheet: Supplementary Table 8
Gene_ID	Predicted function	Putative encoded protein	Status in the gene cluster	log2 fold change in expression ΔspoIIE_C5 relative to the WT
				4 h	11 h	23 h
Cbei_0233	4-alpha-glucanotransferase		_	-0.536	-1.474	2.319
Cbei_0234	Alanine racemase		_	0.21	-0.093	0.27
Cbei_0235	encapsulation protein CapA	CapA	_	-0.448	0.065	-0.653
Cbei_0236	efflux transporter, RND family, MFP subunit		transport	-1.12	1.159	-0.176
Cbei_0237	ABC transporter related		transport	-1.358	0.829	0.212
Cbei_0238	protein of unknown function DUF214		_	-1.431	1.214	0.02
Cbei_0239	Cystathionine gamma-synthase		biosynthetic-additional	0.648	0.143	0.505
Cbei_0240	Cystathionine gamma-synthase		biosynthetic-additional	0.994	-0.075	0.66
Cbei_0241	transcriptional regulator, MarR family		regulatory	-0.367	-0.246	0.071
Cbei_0242	PTS system, mannitol-specific IIC subunit		_	-0.191	-0.895	-2.018
Cbei_0243	transcriptional antiterminator	BglG	_	-0.011	-1.078	-0.888
Cbei_0244	phosphoenolpyruvate-dependent sugar phosphotransferase system, EIIA 2		_	0.394	-0.877	1.079
Cbei_0245	Mannitol dehydrogenase, C-terminal domain		_	0.303	-0.402	0.27
Cbei_0246	glucosamine--fructose-6-phosphate aminotransferase, isomerizing		biosynthetic-additional	0.359	-0.718	-4.268
Cbei_0247	serine O-acetyltransferase		_	3.67	0.294	-1.247
Cbei_0248	Oleoyl-(acyl-carrier-protein) hydrolase		biosynthetic-additional	3.371	0.944	-3.991
Cbei_0249	conserved hypothetical protein		biosynthetic-additional	2.782	0.217	-3.178
Cbei_0250	amino acid adenylation domain	CircA	biosynthetic	2.972	0.214	-2.505
Cbei_0251	Erythronolide synthase., Aspartate racemase	CircB	biosynthetic	2.603	-0.397	-1.787
Cbei_0252	Male sterility C-terminal domain	CircC	biosynthetic-additional	1.82	-0.308	-2.865
Cbei_0253	peptidase U32		_	1.052	-0.545	-4.644
Cbei_0254	AMP-dependent synthetase and ligase		biosynthetic	1.876	-0.519	-1.111
Cbei_0255	BAAT/Acyl-CoA thioester hydrolase-like protein		_	1.905	-0.62	-0.597
Cbei_0256	4'-phosphopantetheinyl transferase		biosynthetic-additional	0.894	-0.519	-0.766
Cbei_0257	malonyl CoA-acyl carrier protein transacylase		biosynthetic	0.654	-0.524	-1.628
Cbei_0259	transcriptional regulator, TetR family		_	1.668	-0.515	0.984
Cbei_0260	drug resistance transporter, EmrB/QacA subfamily		regulatory	3.641	-1.279	0.624
Cbei_0261	efflux transporter, RND family, MFP subunit		transport	2.608	-1.777	0.693
Cbei_0262	ABC transporter related		transport	3.168	-1.663	0.755
Cbei_0263	protein of unknown function DUF214		transport	1.198	-2.332	-1.25
Cbei_0264	hypothetical protein		_	1.869	-2.753	-0.021
Cbei_0265	hypothetical protein		_	1.719	-1.962	-1.618
Cbei_0266	hypothetical protein		_	-0.52	-2.537	-2.913
Cbei_0267	two component transcriptional regulator, LytTR family		_	-0.533	-0.047	-0.673
Cbei_0268	signal transduction histidine kinase regulating citrate/malate metabolism		_	-0.892	-0.892	-1.201
Cbei_0269	Accessory gene regulator B		_	-0.187	0.61	-3.154
Cbei_0271	transcriptional regulator, TetR family		_	1.124	-0.212	0.761
Cbei_0272	dipeptidyl aminopeptidase/acylaminoacyl-peptidase related protein		biosynthetic-additional	0.778	-0.057	1.183
Cbei_0273	NADPH-dependent FMN reductase		_	1.16	0.96	1.191
Cbei_0274	major facilitator superfamily MFS_1		transport	1.053	0.107	0.563
Cbei_0275	iron dependent repressor		_	0.749	-0.653	0.472
Cbei_0276	transcriptional regulator, MarR family		_	1.302	-0.29	0.554
Cbei_0277	cyclase family protein		_	1.971	-2.858	-0.23
Cbei_0278	transcriptional regulator, MarR family		_	-0.077	-2.327	-2.529
Cbei_0279	methyl-accepting chemotaxis sensory transducer		_	1.027	-1.148	1.343
Cbei_0280	hypothetical protein		_	1.84	-0.339	-2.234
Cbei_0281	hypothetical protein		_	0.926	0.709	-3.135
Cbei_0282	hypothetical protein		_	0.815	0.415	-4.154
Cbei_0283	ABC transporter related		_	1.471	0.514	-2.171

## Sheet: Supplementary Table 9
Gene_ID	Predicted function	Putative encoded protein	log2 fold change in expression ΔspoIIE_C5 relative to the WT
			4 h	11 h	23 h
Granulose formation and degradation
Cbei_0285	Glycogen/starch/alpha-glucan phosphorylase		0.06	1.445	-1.257
Cbei_2468	Glycogen debranching enzyme	GlgX	-3.004	-2.294	-4.952
Cbei_4905	Glucose-1-phosphate adenylyltransferase	GlgC	-0.122	0.665	2.357
Cbei_4904	Glucose-1-phosphate adenylyltransferase, GlgD subunit	GlgD	-0.565	0.617	1.647
Cbei_4906	Alpha amylase, catalytic region		-0.242	0.952	1.041
Cbei_4907	Glycogen/starch/alpha-glucan phosphorylase	GlgP	0.165	0.735	1.384
Cbei_4908	Glycogen/starch synthase, ADP-glucose type	GlgA	0.509	1.023	1.999
Cbei_4909	1,4-alpha-glucan branching enzyme	GlgB	0.882	1.041	1.846
Cbei_4295	Carbon storage regulator, CsrA	CsrA	-0.305	1.026	1.085
Glycolysis
Cbei_0341	Glucose-6-phosphate isomerase	Pgi	0.49	0.23	0.365
Cbei_0485	Pyruvate kinase	Pyk	0.526	0.402	0.527
Cbei_0584	Phosphofructokinase	Pfk	2.38	0.557	-1.872
Cbei_0597	Glyceraldehyde-3-phosphate dehydrogenase, type I	Gap	1.682	-0.673	-0.248
Cbei_0598	Phosphoglycerate kinase	Pgk	1.587	-1.129	-0.437
Cbei_0599	Triose-phosphate isomerase	Tpi	1.282	-0.966	-0.334
Cbei_0600	phosphoglycerate mutase, 2,3-bisphosphoglycerate-independent	Pgm	1.007	0.416	-0.216
Cbei_0602	Phosphopyruvate hydratase	Eno	-0.326	-0.813	-0.724
Cbei_0998	6-phosphofructokinase	Pfk	-0.769	0.619	1.011
Cbei_1267	Phosphoglycerate mutase	Pgm	-0.263	-0.059	0.095
Cbei_1412	Pyruvate kinase	Pyk	-4.125	-4.222	-7.385
Cbei_1719	Phosphoglycerate mutase	Pgm	0.5	0.555	1.191
Cbei_1759	Phosphoglycerate mutase 1 family	Pgm	-3.224	-1.999	-8.525
Cbei_1829	Phosphoglycerate mutase	Pgm	-0.377	0.561	-0.13
Cbei_1903	Fructose-1,6-bisphosphate aldolase, class II	Fba	1.443	0.317	1.616
Cbei_2467	Fructose-1,6-bisphosphatase	Fpb1	0.48	0.356	0.48
Cbei_3039	Fructose-bisphosphate aldolase	Fba	-4.615	-4.621	-4.615
Cbei_3922	Phosphoglycerate mutase	Pgm	0.946	0.115	-0.166
Cbei_4541	fructose-1,6-bisphosphatase	Fpb	-0.412	0.17	-1.107
Cbei_4851	Pyruvate kinase	Pyk	1.04	-0.655	-0.924
Cbei_4852	6-phosphofructokinase	Pfk	0.889	-0.77	-0.785
Acidogenesis and alcoholesis
Cbei_0203	Phosphate butyryltransferase	Ptb	1.694	-0.434	1.571
Cbei_0204	Butyrate kinase	Buk1	1.562	-0.206	2.309
Cbei_0223	Alcohol dehydrogenase GroES domain protein	Adh	0.198	-1.316	0.693
Cbei_0305	Iron-containing alcohol dehydrogenase	Adh	-1.621	-2.09	-4.364
Cbei_0321	Enoyl-CoA hydratase/isomerase	Crt	0.51	0.358	1.873
Cbei_0322	Acyl-CoA dehydrogenase domain protein	Bcd	0.6	0.446	1.782
Cbei_0323	Electron transfer flavoprotein, alpha/beta-subunit-like protein	EtfA	1.264	0.28	1.566
Cbei_0324	Electron transfer flavoprotein, alpha/beta-subunit-like protein	EtfB	1.469	0.288	1.635
Cbei_0325	3-hydroxybutyryl-CoA dehydrogenase	Hbd	0.951	0.604	1.666
Cbei_0411	Acetyl-CoA acetyltransferase	ThlA	1.162	1.029	2.04
Cbei_0528	Alcohol dehydrogenase, zinc-binding domain protein	Adh	-2.882	-3.935	-4.664
Cbei_0544	Alcohol dehydrogenase GroES domain protein	Adh	-2.077	0.061	-3.047
Cbei_0674	NAD-dependent aldehyde dehydrogenase-like protein	Adh	0.621	0.194	-2.323
Cbei_0685	Alcohol dehydrogenase GroES domain protein	Adh	0.727	1.044	-0.277
Cbei_0727	Aldehyde dehydrogenase	Ald	0.318	0.089	0.242
Cbei_0729	Aldehyde dehydrogenase	Ald	-0.399	0.214	-0.737
Cbei_1014	L-lactate dehydrogenase	Ldh	-0.113	0.172	-2.121
Cbei_1164	Phosphate acetyltransferase	Pta	1.887	-0.499	1.027
Cbei_1165	Acetate kinase	Ack	1.741	-0.473	1.436
Cbei_1464	Alcohol dehydrogenase GroES domain protein	Adh	-0.685	2.208	1.773
Cbei_1722	Iron-containing alcohol dehydrogenase	AdhB	1.616	0.121	2.096
Cbei_1932	Iron-containing alcohol dehydrogenase	Adh	0.723	0.015	1.208
Cbei_1937	Iron-containing alcohol dehydrogenase	Adh	-0.209	0.868	-0.488
Cbei_1953	Aldehyde dehydrogenase	Ald	0.162	-1.021	-1.529
Cbei_2034	Enoyl-CoA hydratase/isomerase	Crt	0.603	0.361	1.828
Cbei_2035	Acyl-CoA dehydrogenase domain protein	Bcd	0.431	0.285	1.743
Cbei_2036	Electron transfer flavoprotein, alpha/beta-subunit-like protein	EtfA	0.065	0.234	1.518
Cbei_2037	Electron transfer flavoprotein, alpha/beta-subunit-like protein	EtfB	0.465	0.316	1.682
Cbei_2181	Iron-containing alcohol dehydrogenase	AdhA	0.54	1.198	2.3
Cbei_2194	Iron-containing alcohol dehydrogenase	Adh	-0.74	1.253	0.749
Cbei_2230	Enoyl-CoA hydratase/isomerase	Crt	1.021	0.27	6.836
Cbei_2231	Enoyl-CoA hydratase/isomerase	Crt	1.165	0.318	5.884
Cbei_2243	Alcohol dehydrogenase, zinc-binding domain protein	Adh	1.75	1.186	0.74
Cbei_2282	Aldehyde dehydrogenase	Ald	-1.267	-0.854	-0.882
Cbei_2421	Iron-containing alcohol dehydrogenase	Adh	0.879	0.07	0.815
Cbei_2518	Aldehyde dehydrogenase	Ald	0.053	2.044	-0.486
Cbei_2572	Aldehyde dehydrogenase	Ald	-0.962	-0.515	-2.977
Cbei_2653	3-oxoacid CoA-transferase, B subunit	CtfA	-5.497	-5.015	-6.585
Cbei_2654	3-oxoacid CoA-transferase, A subunit	CtfB	-5.676	-4.488	-6.458
Cbei_2753	Iron-containing alcohol dehydrogenase	Adh	0.622	0.013	1.985
Cbei_2789	L-lactate dehydrogenase	Ldh	-0.218	3.213	-0.701
Cbei_2883	Acyl-CoA dehydrogenase domain protein		-0.041	-0.345	2.783
Cbei_3402	Phosphate acetyltransferase		-0.554	-0.227	-1.312
Cbei_3630	Acetyl-CoA acetyltransferase	ThlB	1.092	0.704	1.569
Cbei_3642	Pyruvate ferredoxin/flavodoxin oxidoreductase, beta subunit		-0.345	0.005	-1.457
Cbei_3820	3-hydroxyacyl-CoA dehydrogenase, NAD-binding	Hbd	-0.037	-0.299	0.893
Cbei_3832	Aldehyde dehydrogenase	Ald	0.481	-0.496	0.69
Cbei_3833	3-oxoacid CoA-transferase, A subunit	CtfA	0.581	-0.412	0.622
Cbei_3834	3-oxoacid CoA-transferase, B subunit	CtfB	0.649	-0.322	0.693
Cbei_3835	Acetoacetate decarboxylase	Adc	0.74	-0.233	0.916
Cbei_3864	Alcohol dehydrogenase GroES domain protein	Adh	0.7	0.726	1.909
Cbei_3890	Alcohol dehydrogenase GroES domain protein	Adh	2.422	-0.044	-0.586
Cbei_4006	Butyrate kinase	Buk2	-0.601	0.807	-1.553
Cbei_4041	Pyruvate ferredoxin/flavodoxin oxidoreductase, beta subunit		-4.862	-3.988	-6.03
Cbei_4045	Aldehyde dehydrogenase	Ald	-0.087	-0.291	0.277
Cbei_4053	Iron-containing alcohol dehydrogenase	Adh	1.421	0.059	-1.613
Cbei_4054	Aldehyde dehydrogenase	Ald	1.154	-0.43	-0.745
Cbei_4072	L-lactate dehydrogenase	Ldh	1.066	0.959	1.706
Cbei_4354	Iron-containing alcohol dehydrogenase	Adh	-0.013	0.626	1.968
Cbei_4542	Acyl-CoA dehydrogenase domain protein		-1.795	-2.51	-3.213
Cbei_4544	Enoyl-CoA hydratase/isomerase	Crt	-2.752	-3.049	-1.394
Cbei_4552	Iron-containing alcohol dehydrogenase	Adh	-0.089	0.89	-1
Cbei_4609	Butyrate kinase	Buk3	-0.723	0.175	-1.019
Cbei_4903	L-lactate dehydrogenase	Ldh	-0.302	0.36	-1.125
Cbei_4933	Iron-containing alcohol dehydrogenase	Adh	-1.359	-0.647	-4.549
Cbei_4936	Aldehyde dehydrogenase	Ald	-0.409	-1.313	-1.741
Cbei_5056	Acyl-CoA dehydrogenase domain protein		1.013	0.345	-0.464

## Sheet: Supplementary Table 10
Gene_ID	Predicted function	Putative encoded protein	log2 fold change in expression ΔspoIIE_C5 relative to the WT
			4 h	11 h	23 h
Ascorbate transport
Cbei_2739	putative sugar-specific permease, SgaT/UlaA		-2.322	-1.348	-3.51
Cbei_2740	phosphotransferase system, lactose/cellobiose-specific IIB subunit		-4.069	-0.504	-4.496
Cbei_2741	putative PTS IIA-like nitrogen-regulatory protein PtsN		-4.271	-0.254	-4.854
Calcium transport
Cbei_1036	ATPase, P-type (transporting), HAD superfamily, subfamily IC		-2.324	-2.398	-5.801
Cobalt transport
Cbei_1774	protein of unknown function DUF47		-0.049	-0.248	-1.768
Cbei_3709	cobalt/cobalamin transport protein CbiN		1.76	-0.072	0.087
Iron transport
Cbei_0477	periplasmic solute binding protein		-0.218	0.746	-2.656
Cbei_1783	Integral membrane protein TerC		-4.06	-5.677	-5.862
Cbei_4017	methyl-accepting chemotaxis sensory transducer		-0.602	2.786	-0.219
Cbei_4198	FeoA family protein	FeoA	-1.784	-0.387	-2.372
Magenesium transport
Manganese transport
Cbei_4070	Mn2+/Fe2+ transporter, NRAMP family		-7.587	-5.276	-10.608
Molybdenum transport
Cbei_1992	molybdenum ABC transporter, periplasmic molybdate-binding protein		-2.08	1.016	1.223
Phosphate transport
Cbei_1127	phosphate binding protein		-0.015	-1.343	4.289
Cbei_1128	phosphate ABC transporter, inner membrane subunit PstC	PstC	-0.229	-1.147	4.245
Cbei_1129	phosphate ABC transporter, inner membrane subunit PstA	PstA	-0.603	-1.434	4.498
Cbei_1130	phosphate ABC transporter, ATPase subunit		-1.019	-1.876	3.794
Cbei_1131	phosphate uptake regulator, PhoU	PhoU	-0.837	-1.356	4.301
Cbei_1132	phosphate uptake regulator, PhoU	PhoU	-0.583	-0.086	2.737
Riboflavin
Cbei_0760	membrane spanning protein		1.902	-0.028	1.63
Sodium transport
Cbei_2913	Na+/H+ antiporter		-2.34	-2.144	-5.449
Cbei_3708	putative transporter		-0.096	0.841	-5.036
Sulfate transport
Cbei_4187	sulfate adenylyltransferase, small subunit		0.754	-0.657	1.873
Cbei_4194	sulfate ABC transporter, periplasmic sulfate-binding protein		0.995	-2.244	0.941
Other ion and vitamin transporters
Cbei_0231	binding-protein-dependent transport systems inner membrane component		-0.513	-0.677	2.083
Cbei_0605	binding-protein-dependent transport systems inner membrane component		-1.153	-2.169	-6.025
Cbei_0610	ABC transporter related		-1.813	-0.899	-2.749
Cbei_0611	ABC-type nitrate/sulfonate/bicarbonate transport systems periplasmic components-like protein		-1.275	-2.913	-2.489
Cbei_0623	nitrogenase iron protein		-2.228	0.2	-2.779
Cbei_0646	pantothenic acid transporter		1.782	0.31	0.411
Cbei_0818	E1-E2 ATPase-associated domain protein		-0.077	0.185	-2.031
Cbei_0877	ABC transporter, periplasmic-binding, putative		-5.253	-1.08	-7.5
Cbei_0933	ABC transporter substrate-binding protein		-5.481	-1.913	-9.303
Cbei_0934	ABC transporter related		-5.381	-1.668	-8.204
Cbei_0935	binding-protein-dependent transport systems inner membrane component		-4.795	-0.941	-8.286
Cbei_0978	major facilitator superfamily MFS_1		-0.085	0.254	-1.729
Cbei_1404	niacin transporter		-1.065	4.624	1.64
Cbei_2109	Arsenical resistance operon trans-acting repressor ArsD		-0.048	0.906	1.74
Cbei_2112	arsenical-resistance protein		0.015	0.235	1.817
Cbei_2154	drug resistance transporter, EmrB/QacA subfamily		-0.118	0.319	-4.873
Cbei_2190	protein of unknown function DUF21		-4.098	-1.187	-4.437
Cbei_2419	Polyphosphate kinase		-0.146	-1.115	3.07
Cbei_2549	Ferritin, Dps family protein		0.573	1.243	2
Cbei_2649	Ferric reductase domain protein transmembrane component, N-terminal domain		-2.731	-0.334	-5.38
Cbei_2921	drug resistance transporter, EmrB/QacA subfamily		0.45	0.22	4.892
Cbei_2937	Chloride channel, core		1.281	0.187	-1.859
Cbei_3000	FAD-dependent pyridine nucleotide-disulphide oxidoreductase		-1.076	0.372	-2.079
Cbei_3096	ABC transporter related		-1.803	-0.593	-2.442
Cbei_3279	cation diffusion facilitator family transporter		-2.358	-0.787	-6.213
Cbei_3327	protein of unknown function DUF21		0.619	0.051	-2.173
Cbei_3331	ABC transporter related		3.555	-1.987	0.282
Cbei_3332	aliphatic sulfonates family ABC transporter, periplsmic ligand-binding protein		3.879	-1.814	0.529
Cbei_3333	binding-protein-dependent transport systems inner membrane component		4.137	-1.258	0.755
Cbei_3336	drug resistance transporter, EmrB/QacA subfamily		4.444	-1.398	-0.887
Cbei_4243	ATPase, P-type (transporting), HAD superfamily, subfamily IC		-3.103	-3.255	-3.323
Cbei_4425	carbonic anhydrase		0.495	0.558	1.721
Cbei_4433	ABC transporter related		0.79	0.996	2.699
Cbei_4679	binding-protein-dependent transport systems inner membrane component		-1.557	-2.218	-2.531
Cbei_4682	methyl-accepting chemotaxis sensory transducer		-0.261	0.301	-1.573
Cbei_4801	Heavy metal transport/detoxification protein		-0.062	-2.104	0.449
Cbei_4802	heavy metal translocating P-type ATPase		0.072	-1.884	0.902
Cbei_4818	hemerythrin-like metal-binding protein		-1.355	2.012	0.695
BCA transport
Cbei_1763	BCAA ABC transporter permease		1.848	-1.644	-0.893
Cbei_5042	BCAA ABC transporter substrate-binding protein		1.09	3.926	1.098
Cbei_5043	BCAA ABC transporter ATP-binding protein		1.603	3.991	0.947
Cbei_5044	BCAA ABC transporter ATP-binding protein		0.96	3.739	1.093
Cbei_5045	BCAA ABC transporter ATP-binding protein	LivG	0.457	3.261	0.876
Cbei_5046	BCAA ABC transporter ATP-binding protein		0.925	3.765	1.005
Glutamate and glutamine transport
Cbei_1883	Glutamate/gamma-aminobutyrate family transporter YjeM	YjeM	-4.089	-4.458	-4.396
Cbei_2391	Glutamine ABC transporter substrate-binding protein		0.259	1.635	-1.826
Glycine transport
Cbei_3539	Glycine/betaine ABC transporter permease		0.449	-0.302	-3.041
Cbei_3540	Glycine/betaine ABC transporter ATP-binding protein		0.173	-0.512	-1.854
Cbei_3541	Glycine/betaine ABC transporter substrate-binding protein		-0.11	-0.742	-2.733
Cbei_3542	Glycine/betaine ABC transporter		0.535	-0.572	-2.042
Proline transport
Cbei_2870	Proline/glycine betaine ABC transporter permease subunit		-1.433	2.1	2.002
Cbei_2871	Proline/glycine betaine ABC transporter ATP-binding protein		-1.682	1.96	1.705
Methionine transport
Cbei_0626	MetQ/NlpA family ABC transporter substrate-binding protein	MetQ	-2.375	-0.916	-4.642
Cbei_0624	Methionine ABC transporter ATP-binding protein	MetN	-2.506	-0.879	-4.198
Cbei_0625	Methionine ABC transporter permease	MetP	-2.514	-1.354	-4.247
Cbei_0637	Methionine ABC transporter permease	MetI	1.065	-0.315	1.806
Other amino acid transporters
Cbei_0788	Amino acid permease		2.206	0.914	0.924
Cbei_2072	Amino acid ABC transporter substrate-binding protein		-6.862	-3.843	-9.218
Cbei_2122	Amino acid/peptide transporter		1.431	-0.408	3.339
Cbei_2890	Amino acid ABC transporter substrate-binding protein		-3.104	-3.084	-5.857
Cbei_3265	Amino acid-binding protein		-0.48	0.557	-3.973
Cbei_3652	Amino acid ABC transporter substrate-binding protein		-1.993	-2.171	-4.832
Cbei_3977	Oligopeptide/dipeptide ABC transporter, ATPase subunit	AppD	-2.632	-4.524	-5.874
Cbei_3978	Oligopeptide/dipeptide ABC transporter, ATPase subunit	AppF	-2.838	-4.992	-4.984
Cbei_3979	Binding-protein-dependent transport systems inner membrane component	AppC	-2.552	-5.12	-4.127
Cbei_3980	Binding-protein-dependent transport systems inner membrane component	AppB	-3.296	-4.112	-5.028
Cbei_3981	Extracellular solute-binding protein, family 5	AppA	-5.032	-4.869	-6.044
Cbei_4028	Amino acid permease		0.505	-0.472	-2.241
Cbei_4527	Amino acid permease-associated region		-3.042	-3.572	-6.154
Cbei_4800	Amino acid ABC transporter		0.638	0.448	2.096
Amino acid metabolism
Cbei_0054	Peptidase M24		0.499	-1.802	0.822
Cbei_0069	Homocitrate synthase		1.98	0.064	2.456
Cbei_0075	Phosphoserine aminotransferase		0.711	0.609	1.74
Cbei_0111	Amidohydrolase-like protein		-5.168	-6.045	-6.59
Cbei_0122	ATP:guanido phosphotransferase		0.02	-2.026	0.748
Cbei_0212	Acetolactate synthase, small subunit		-2.84	2.017	1.556
Cbei_0213	2-isopropylmalate synthase/homocitrate synthase family protein		-2.891	1.591	1.377
Cbei_0214	3-isopropylmalate dehydratase, large subunit		-3.224	1.697	1.85
Cbei_0215	3-isopropylmalate dehydratase, small subunit		-3.165	1.884	1.997
Cbei_0216	3-isopropylmalate dehydrogenase		-3.31	1.805	2.182
Cbei_0217	Acetolactate synthase, large subunit, biosynthetic type		-3.675	1.407	1.414
Cbei_0218	Ketol-acid reductoisomerase		-2.644	1.766	1.536
Cbei_0247	Serine O-acetyltransferase		3.67	0.294	-1.247
Cbei_0353	Extracellular solute-binding protein, family 5		-2.268	-2.789	-3.599
Cbei_0444	Glutamine synthetase, catalytic region		2.171	1.836	-0.215
Cbei_0518	Aspartate-semialdehyde dehydrogenase		-0.822	-1.907	-1.63
Cbei_0528	Alcohol dehydrogenase, zinc-binding domain protein		-2.882	-3.935	-4.664
Cbei_0585	Cysteine desulfurase		-4.759	-1.814	-8.785
Cbei_0609	O-acetylhomoserine/O-acetylserine sulfhydrylase		-0.789	-1.034	-2.324
Cbei_0622	Cysteine synthase		-3.637	-0.528	-3.527
Cbei_0629	Cystathionine gamma-synthase		-2.442	-0.951	-4.134
Cbei_0630	Pyridoxal-5'-phosphate-dependent protein, beta subunit		-2.415	-1.399	-4.581
Cbei_0662	Glutamate synthase (NADPH), homotetrameric		1.476	0.536	2.278
Cbei_0766	O-acetylhomoserine/O-acetylserine sulfhydrylase		2.207	-1.15	0.72
Cbei_1034	Asparagine synthase (glutamine-hydrolyzing)		-5.532	-1.875	-8.561
Cbei_1043	Branched-chain amino acid aminotransferase		1.7	0.208	1.437
Cbei_1098	Aminotransferase, class V		1.082	-1.526	1.216
Cbei_1464	Alcohol dehydrogenase GroES domain protein		-0.685	2.208	1.773
Cbei_1466	Glutamate synthase (NADPH), homotetrameric		1.223	0.769	2.221
Cbei_1510	Dihydroxy-acid dehydratase		-2.526	1.945	1.842
Cbei_1667	Extracellular solute-binding protein, family 3		0.093	-0.632	-2.523
Cbei_1750	Glutamine amidotransferase of anthranilate synthase		-1.036	3.368	3.43
Cbei_1751	Anthranilate phosphoribosyltransferase		-1.47	3.766	3.94
Cbei_1752	Indole-3-glycerol-phosphate synthase		-2.464	3.656	2.761
Cbei_1753	Phosphoribosylanthranilate isomerase		-1.949	3.555	3.424
Cbei_1754	Tryptophan synthase, beta subunit		-0.832	3.995	3.571
Cbei_1755	Tryptophan synthase, alpha subunit		-0.998	4.203	3.228
Cbei_1791	Tetrahydrodipicolinate succinyltransferase N-terminal domain protein		1.676	0.396	1.419
Cbei_1795	Dihydrodipicolinate reductase		0.916	0.15	-2.749
Cbei_1796	Dihydrodipicolinate synthase		0.656	-0.01	-2.236
Cbei_1812	Histidinol-phosphate aminotransferase		0.53	0.744	1.796
Cbei_1813	Peptidase M42 family protein		0.538	0.554	1.916
Cbei_1851	Cysteine desulfurase, SufS subfamily		-0.367	-1.97	2.515
Cbei_1924	Aminotransferase, class I and II		-0.717	-0.717	-3.186
Cbei_1969	Carbamate kinase		-1.664	-0.689	-1.016
Cbei_2011	Isopropylmalate/homocitrate/citramalate synthase-like protein		-2.526	-0.637	-1.345
Cbei_2012	Homocitrate synthase		-1.8	-0.509	-0.998
Cbei_2183	Glutamate synthase (NADPH), homotetrameric		0.483	1.37	2.919
Cbei_2229	Amidohydrolase		1.261	0.608	7.005
Cbei_2232	Serine dehydratase alpha chain		1.579	0.751	5.486
Cbei_2330	Methionine synthase, vitamin-B12 independent		0.521	0.183	1.901
Cbei_2397	Membrane dipeptidase		-1.413	-1.023	-2.933
Cbei_2446	Ornithine carbamoyltransferase		1.045	-0.961	2.111
Cbei_2597	DegT/DnrJ/EryC1/StrS aminotransferase		-6.157	-4.308	-9.505
Cbei_2598	Amine oxidase		-5.874	-2.736	-8.74
Cbei_2599	Cysteine desulfurase family protein		-5.915	-2.872	-7.967
Cbei_2698	Glyoxalase/bleomycin resistance protein/dioxygenase		-0.603	-0.157	-2.626
Cbei_2710	Peptidase M42 family protein		2.043	-0.247	3.149
Cbei_2730	Thiamine pyrophosphate protein, central region		2.276	0.073	0.293
Cbei_2868	Thiamine pyrophosphate protein domain protein TPP-binding		0.288	-1.04	-5.25
Cbei_2934	Dihydrodipicolinate reductase		-2.181	1.155	2.576
Cbei_3220	Fumarate lyase		0.135	0.068	1.631
Cbei_3543	O-acetylhomoserine aminocarboxypropyltransferase		-2.818	-0.426	-2.497
Cbei_3719	Maltose O-acetyltransferase		0.777	0.475	2.034
Cbei_3843	Transferase hexapeptide repeat containing protein		0.894	0.833	1.585
Cbei_3891	Aminotransferase class-III		2.239	-0.21	-1.463
Cbei_4040	Peptidase M29, aminopeptidase II		-0.07	-1.253	-1.509
Cbei_4097	Amino acid permease-associated region		-0.257	0.117	-2.555
Cbei_4105	Amine oxidase		-3.846	-4.035	-6.073
Cbei_4127	Dihydroxy-acid dehydratase		1.551	-0.086	2.656
Cbei_4203	Glutamate synthase, NADH/NADPH, small subunit		1.407	1.646	1.095
Cbei_4207	Aspartate kinase		2.001	-0.29	1.787
Cbei_4336	Aminotransferase, class V		5.146	-2.165	1.086
Cbei_4498	L-serine dehydratase, iron-sulfur-dependent, alpha subunit		1.347	0.416	1.753
Cbei_4515	Argininosuccinate synthase		0.852	-2.151	1.963
Cbei_4516	Argininosuccinate lyase		1.68	-1.719	1.916
Cbei_4517	N-acetyl-gamma-glutamyl-phosphate reductase		1.531	-2.184	2.008
Cbei_4518	Arginine biosynthesis bifunctional protein ArgJ		1.096	-1.884	2.534
Cbei_4519	Acetylglutamate kinase		1.506	-1.79	2.928
Cbei_4520	Acetylornithine and succinylornithine aminotransferase		1.391	-1.541	2.796
Cbei_4521	Ornithine carbamoyltransferase		1.109	-1.297	2.576
Cbei_4574	Chorismate synthase		0.763	1.346	1.803
Cbei_4575	3-phosphoshikimate 1-carboxyvinyltransferase		0.042	1.44	1.506
Cbei_4576	3-dehydroquinate synthase		0.283	1.323	1.564
Cbei_4577	Phospho-2-dehydro-3-deoxyheptonate aldolase		0.599	1.182	1.506
Cbei_4594	D-isomer specific 2-hydroxyacid dehydrogenase, NAD-binding		0.24	0.382	1.784
Cbei_4673	Lipolytic protein, G-D-S-L family		-1.149	-1.385	-3.143
Cbei_4711	Glutamine--scyllo-inositol transaminase		-4.177	-4.6	-5.284
Cbei_4776	Dihydrodipicolinate synthase		0.956	0.252	1.704
Cbei_4787	Diaminopimelate decarboxylase		0.248	0.048	-1.91
Cbei_4843	Oxidoreductase domain protein		1.123	-0.003	1.765

[truncated: 2 more sheets: Supplementary Table 11, Supplementary Table 12]
